# Supplementary material for: ERBB3-Independent Activation of the PI3K Pathway in EGFR-Mutant Lung Adenocarcinomas
Source: Oxford University Press journal article supplement (doi:10.1158/0008-5472.can-13-1625), 2015-01-17
Supplement: 00085472can131625-sup-114700_2_supp_2794903_ngwj9p.xlsx [file 00085472can131625-sup-114700_2_supp_2794903_ngwj9p.xlsx]

## Sheet: Table I
Supplementary Table 1: List of mice treated with erlotinib
Mouse ID	Sex	TetO-EGFR	CCSP-rtTA	TetO-Cre	Erbb3	Length of Erlotinib Treatment	Tumor shrinkage	Histology
K4847	M	L858R +	+	-	fl/fl	5 days	0.891626	Tumor
K4976	M			-	fl/fl	5 days	0.964516	Tumor
K5084	M			+	fl/+	5 days	0.480315	Tumor
K4644	M			+	fl/fl	5 days	0.736111	Tumor
K5086	M			+	fl/fl	5 days	0.0374332	Tumor
K4650	F			+	fl/fl	5 days	0.824645	Tumor
K6107	F	L858R +	+	-	fl/fl	4 weeks	0.672897	Minimal tumor and scarring
K7249	F			-	fl/fl	4 weeks	0.971963	Scarring
K6987	M			-	fl/fl	4 weeks	0.738372	Minimal tumor and scarring
8329	F			-	fl/fl	4 weeks	0.95	ND
8735	F			-	fl/fl	4 weeks	0.99	ND
8944	M			-	fl/fl	4 weeks	1	ND
8937	m			-	fl/fl	4 weeks	0.01	ND
K3380	M			+	fl/+	4 weeks	0.716714	Minimal tumor
K6104	F			+	fl/+	4 weeks	0.0706806	Minimal tumor and scarring
K6335	F			+	fl/+	4 weeks	0.954762	Normal
K6501	F			+	fl/fl	4 weeks	0.582278	Minimal tumor and scarring
K6502	F			+	fl/fl	4 weeks	0.541667	Tumor
K1753	F			+	fl/fl	4 weeks	0.553672	Minimal tumor and scarring
K5082	F			+	fl/fl	4 weeks	0.142405	Inflammation, some tumor
K5829	F			+	fl/fl	4 weeks	ND	Normal
K6802	F			+	fl/fl	4 weeks	0.697133	Tumor
K5515	F			+	fl/fl	4 weeks	0.604106	Minimal tumor
8731	F			+	fl/fl	4 weeks	0.99	ND
8733	F			+	fl/fl	4 weeks	0.99	ND
8536	M			+	fl/fl	4 weeks	1	ND
8950	F			+	fl/fl	4 weeks	1	ND
8951	F			+	fl/fl	4 weeks	1	ND
8958	M			+	fl/fl	4 weeks	1	ND
9530	M			+	fl/fl	4 weeks	0.99	ND
K4004	M			+	fl/fl	6 weeks	0.91	Normal
K3191	F	Δ747-752 +	+	+	fl/fl	5 days	0.710204	Minimal tumor and scarring
K3294	M	Δ747-752 +	+	-	+/+	4 weeks	0.477419	Scarring
K3989	F			-	+/+	4 weeks	ND	Normal
K3362	M			-	fl/+	4 weeks	0.323353	Scarring
K5029	F			-	fl/+	4 weeks	0.39798	Minimal tumor and inflmmation
7189	M			-	fl/fl	4 weeks	0.96	ND
7182	F			-	fl/fl	4 weeks	0.87	ND
K6022	M			-	fl/fl	4 weeks	0.806647	Scarring
K5021	F			+	+/+	4 weeks	0.837209	Normal
K3540	M			+	fl/+	4 weeks	0.769231	Scarring
5414	F			+	fl/fl	4 weeks	0.99	ND
K3069	F			+	fl/fl	4 weeks	0.81374	Scarring
ND: not determined
